# Supplementary material for: Cytotoxicity of Mycotoxins and Their Combinations on Different Cell Lines: A Review
Source: MDPI journal article supplement (doi:10.3390/toxins14040244), 2022-03-30
Supplement: s1 [file s1]

## Review

# Cytotoxicity of Mycotoxins and Their Combinations on Different Cell Lines: A Review

Paweł Skrzydlewski, Magdalena Twarużek and Jan Grajewski

**Table S1.** Summary of reviewed literature, cell lines and cytotoxicity assays used, and mycotoxins tested.

| MYCOTOXIN                                                  | CELL LINE                 | CYTOTOXICITY TEST                   | REFERENCE                      |
|------------------------------------------------------------|---------------------------|-------------------------------------|--------------------------------|
| SINGLE MYCOTOXIN<br>Patulin                                |                           |                                     |                                |
|                                                            | HepG-2                    | MTT                                 | Fernández-Blanco et al. (2018) |
|                                                            | HepG-2                    | MTT                                 | Ayed-Boussema et al. (2013)    |
|                                                            | HepG-2                    | CCK-8                               | Zhang et al. (2022)            |
|                                                            | HepG-2                    | MTT                                 | Yang et al. (2018)             |
|                                                            | CHO-K1                    | MTT, NR                             | Ferrer et al. (2009)           |
|                                                            | CHO-K1                    | MTT                                 | Zouaoui et al. (2016)          |
|                                                            | HEK293                    | MTT                                 | Zhang et al. (2014)            |
|                                                            | Caco-2                    | MTT                                 | Assunção et al. (2019)         |
|                                                            | H9c2                      | MTT                                 | Zhang et al. (2021)            |
|                                                            | HCT116                    | MTT                                 | Kwon et al. (2012)             |
|                                                            | SK                        | MTT                                 | Hanelt et al. (1994)           |
| Aflatoxins<br>AFB1, AFM1<br>AFB1, AFM1<br>AFM1<br>AFB1     | BME                       | CCK-8                               | Wu et al. (2021)               |
|                                                            | Caco-2, Hep-G2, SK-N-SH   | MTT, LDH release                    | Zheng et al. (2018)            |
|                                                            | Caco-2                    | MTT                                 | Gao et al. (2016)              |
|                                                            | BRL 3A                    | MTT, LDH release                    | Sun et al. (2015)              |
|                                                            | Caco-2, Raw264.7<br>MDBK  | MTT, NR                             | Clarke et al. (2014)           |
|                                                            | BME-UV1                   | Cell Proliferation<br>Reagent WST-1 | Ghadiri et al. (2019)          |
|                                                            | BME-UV1                   | MTT, NR                             | Caruso et al. (2009)           |
|                                                            | Caco-2                    | MTT                                 | J. Zhang et al. (2015)         |
|                                                            | PK-15                     | MTT, LDH release                    | Lei et al. (2013)              |
|                                                            | MAC-T                     | BrdU kit                            | Park et al. (2019)             |
|                                                            |                           |                                     |                                |
| AFB1<br>AFB1<br>AFB1<br>AFB1, AFB2<br>AFB1<br>AFB1<br>AFB1 | BF-2                      | high content screening              | Zhou et al. (2017b)            |
|                                                            | HepG-2, BEAS-2B           | Cell Proliferation<br>Reagent WST-1 | McKean et al. (2006)           |
|                                                            | SK, MDCK, HeLa            | MTT                                 | Hanelt et al. (1994)           |
|                                                            | RTGiLL-W1                 | AlamarBlue, CFDA-AM, NR             | Bernal-Algaba et al. (2021)    |
|                                                            | HepG-2 Raw 264.7          | AlamarBlue                          | Zhou et al. (2017a)            |
|                                                            | HepG-2                    | high content assay                  | Li et al. (2018)               |
|                                                            | primary<br>hepatocytes of | MTT, LDH release                    | He et al. (2010)               |
|                                                            |                           |                                     |                                |

|              |                                   |                                  |                                |
|--------------|-----------------------------------|----------------------------------|--------------------------------|
|              | Cyprinus carpio                   |                                  |                                |
| OCHRATOXIN A | Caco-2                            | MTT                              | Gao et al. (2016)              |
|              | HK-2, HepG-2                      | MTT                              | Pinhão et al. (2020)           |
|              | Het-1A                            | CCK-8                            | Zhao et al. (2021)             |
|              | Caco-2, Raw264.7, MDBK            | MTT                              | Clarke et al. (2014)           |
|              | BRL                               | CCK-8                            | Wang et al. (2020)             |
|              | MAC-T                             | BrdU Kit                         | Lee et al. (2019)              |
|              | HepG-2                            | MTT                              | Wang et al. (2014)             |
|              | Caco-2                            | MTT                              | Assunção et al. (2019)         |
|              | PBM                               | MTT                              | Stoev et al. (2009)            |
|              | RTH-149, PLHC-1, H4IIE            | AlamarBlue, CFDA-AM, NR          | García-Herranz et al. (2019)   |
|              | K562, PBL, PBG                    | MTT                              | Reubel et al. (1987)           |
|              | RTGiLL-W1                         | AlamarBlue, CFDA-AM, NR          | Bernal-Algaba et al. (2021)    |
|              | HepG-2                            | MTT                              | N. Zheng et al. (2018)         |
|              | RPTC, HKC, PKC, LLC-PK1           | MTT, NR                          | Dietrich et al. (2001)         |
|              | HEK 293                           | MTT                              | Gong et al. (2019)             |
| Fumonisin    | PK15                              | MTT                              | Šegvić Klarić et al. (2014)    |
|              | HepG-2                            | MTT                              | Gayathri et al. (2015)         |
|              | Vero                              | MTT                              | Bouslimi et al. (2008)         |
|              | IHKE                              | CCK-8 CASY cell counter          | Knecht et al. (2005)           |
|              | BRL 3A                            | MTT, LDH release                 | Sun et al. (2015)              |
|              | HK-2, HepG-2                      | MTT                              | Pinhão et al. (2020)           |
|              | CHO-K1, V79, C5-O, Caco-2, HepG-2 | MTT                              | Cetin and Bullerman (2005)     |
|              | Caco-2, Raw264.7, MDBK            | MTT, NR                          | Clarke et al. (2014)           |
|              | PK-15                             | MTT, LDH release                 | Lei et al. (2013)              |
|              | GES-1                             | CCK-8, LDH release               | Yu et al. (2020)               |
|              | IPEC-J2                           | MTT                              | Wan et al. (2013)              |
|              | HepG-2, BEAS-2B                   | Cell Proliferation Reagent WST-1 | McKean et al. (2006)           |
|              | PBM                               | MTT                              | Stoev et al. (2009)            |
|              | SK                                | MTT                              | Hanelt et al. (1994)           |
|              | RTGiLL-W1                         | AlamarBlue, CFDA-AM, NRU         | Bernal-Algaba et al. (2021)    |
|              | Porcine lymphocytes               | CCK-8                            | Kachlek et al. (2017)          |
|              | HepG-2                            | MTT                              | Fernández-Blanco et al. (2018) |
|              | BRL 3A                            | MTT, LDH release                 | Sun et al. (2015)              |
|              | Caco-2                            | MTT, NR                          | Kouadio et al. (2005)          |
|              | IPEC-12                           | NR                               | Broekaert et al. (2016)        |
|              | Jurkat T                          | MTT                              | Aupanun et al. (2019)          |
|              | CHO-K1, V79, C5-O,                | MTT                              | Cetin and Bullerman (2005)     |

|  |                                        |                                                |                                  |
|--|----------------------------------------|------------------------------------------------|----------------------------------|
|  | Caco-2, HepG-2                         |                                                |                                  |
|  | PK-15                                  | MTT, LDH release                               | Lei et al. (2013)                |
|  | IPEC-J2                                | MTT                                            | Wan et al. (2013)                |
|  | BF-2 cells                             | high content screening                         | Zhou et al. (2017b)              |
|  | Vero                                   | MTT, NR                                        | Ruiz et al. (2011)               |
|  | RTH-149, PLHC-1, H4IIE                 | AlamarBlue, CFDA-AM, NR                        | García-Herranz et al. (2019)     |
|  | K562, PBL, PBG                         | MTT                                            | Reubel et al. (1987)             |
|  | SK, MDCK, HeLa                         | MTT                                            | Hanelt et al. (1994)             |
|  | RTGiLL-W1                              | AlamarBlue, CFDA-AM, NR                        | Bernal-Algaba et al. (2021)      |
|  | RTgill-W1, IPEC-1, IPEC-2, HepG-2      | NR, SRB and WST-1                              | Mayer et al. (2017)              |
|  | SK, VERO, MDCK, BEL                    | MTT                                            | Reubel G.H. (1989)               |
|  | HepG-2 and RAW 264.7                   | AlamarBlue                                     | Zhou et al. (2017a)              |
|  | HepG-2                                 | high content assay                             | Li et al. (2018)                 |
|  | Caco-2                                 | MTT, NR                                        | Alassane-Kpembi et al. (2013)    |
|  | Porcine lymphocytes                    | CCK-8                                          | Kachlek et al. (2017)            |
|  | primary hepatocytes of Cyprinus carpio | MTT, LDH release                               | He et al. (2010)                 |
|  | IPEC-1                                 | MTT                                            | Alassane-Kpembi et al. (2015)    |
|  | HepG-2, MRC-5                          | AlamarBlue, BrdU                               | Ivanova et al. (2006)            |
|  | Leydig cells                           | CCK-8                                          | Ling et al. (2020)               |
|  | HepG-2                                 | MTT                                            | Taroncher et al. (2020)          |
|  | SerW3                                  | MTT, LDH release                               | Karacaoğlu and Selmanoğlu (2017) |
|  | TM3 Leydig cells                       | MTT, LDH release                               | Yuan et al. (2016)               |
|  | Vero                                   | MTT, NR                                        | Bouaziz et al. (2006)            |
|  | HepG-2                                 | MTT                                            | Fernández-Blanco et al. (2018)   |
|  | RPTCE, NHLF                            | Caspase-3 activity, Hoechst 33258 dye staining | Königs et al. (2009)             |
|  | TM4                                    | CCK-8                                          | Yang et al. (2021)               |
|  | Veto                                   | MTT, NR                                        | Ruiz et al. (2011)               |
|  | SK, MDCK, HeLa                         | MTT                                            | Hanelt et al. (1994)             |
|  | HepG-2, MRC-5                          | AlamarBlue, BrdU                               | Ivanova et al. (2006)            |
|  | Caco-2                                 | MTT                                            | Gao et al. (2016)                |
|  | BRL 3A                                 | MTT, LDH release                               | Sun et al. (2015)                |
|  | Caco-2                                 | MTT, NR                                        | Kouadio et al. (2005)            |
|  | Cheng liver cells                      | MTT                                            | Lee et al. (2013)                |
|  | CHO-K1                                 | MTT                                            | Tatay et al. (2014)              |
|  | CHO-K1                                 | MTT, NR                                        | Ferrer et al. (2009)             |
|  | CHO-K1, V79, C5-O, Caco-2, HepG-2      | MTT                                            | Cetin and Bullerman (2005)       |
|  | PK-15                                  | MTT, LDH release                               | Lei et al. (2013)                |
|  | HepG-2                                 | MTT                                            | Wang et al. (2014)               |

|                              |                                              |                                  |                             |
|------------------------------|----------------------------------------------|----------------------------------|-----------------------------|
|                              | IPEC-J2                                      | MTT                              | Wan et al. (2013)           |
|                              | BF-2                                         | high content screening           | Zhou et al. (2017b)         |
|                              | HepG-2                                       | NR                               | Marin et al. (2019)         |
|                              | K562, PBL, PBG                               | MTT                              | Reubel et al. (1987)        |
|                              | SK, MDCK, HeLa                               | MTT                              | Hanelt et al. (1994)        |
|                              | RTGill-W1                                    | AlamarBlue, CFDA-AM, NR          | Bernal-Algaba et al. (2021) |
|                              | SK, Vero, MDCK, BEL                          | MTT                              | Reubel G.H. (1989)          |
|                              | HepG-2                                       | MTT                              | N. Zheng et al. (2018)      |
|                              | HepG-2, RAW 264.7                            | AlamarBlue                       | Zhou et al. (2017a)         |
|                              | HepG-2                                       | high content assay               | Li et al. (2018)            |
|                              | porcine lymphocytes                          | CCK-8                            | Kachlek et al. (2017)       |
| Citrinin                     | RTL-W1, RTGill-W1, SHK-1, RT-EQ clone 8, CCB | MTT, NR                          | Pietsch et al. (2014)       |
|                              | SK                                           | MTT                              | Hanelt et al. (1994)        |
|                              | PMB                                          | MTT                              | Stoev et al. (2009)         |
|                              | HEK 293                                      | MTT                              | Gong et al. (2019)          |
|                              | PK15                                         | MTT                              | Šegvić Klarić et al. (2014) |
|                              | MDBK, PFBK                                   | Nuclei counted via hemocotometer | Yoneyama et al. (1986)      |
|                              | HepG-2                                       | MTT                              | Gayathri et al. (2015)      |
|                              | Vero                                         | MTT                              | Bouslimi et al. (2008)      |
|                              | HL-60                                        | MTT, trypan blue exclusion       | (Yu et al., 2006)           |
|                              | human osteoblasts                            | MTT                              | Huang et al. (2009)         |
| Enniatins                    | IHKE                                         | CCK-8, CASY assay                | Knecht et al. (2005)        |
|                              | A549                                         | AlamarBlue                       | Johannessen et al. (2007)   |
|                              | Caco-2                                       | MTT,                             | Prosperini et al. (2014)    |
|                              | RTGill-W1                                    | AlamarBlue, CFDA-AM, NR          | Bernal-Algaba et al. (2021) |
|                              | IPEC-J2                                      | Flow cytometry                   | Fraeyman et al. (2018)      |
|                              | HepG-2, MRC-5                                | AlamarBlue, BrdU                 | Ivanova et al. (2006)       |
|                              | Caco-2                                       | MTT                              | Meca et al. (2010)          |
|                              | ENA, ENA1, ENB, ENB1                         |                                  |                             |
|                              | ENA, ENA1, ENB, ENB1                         |                                  |                             |
|                              | ENA, ENA1, ENB, ENB1                         |                                  |                             |
| Combinations of 2 mycotoxins | ENA, ENA1, ENA2, ENB, ENB1, ENB4, ENJ3       | MTT                              | Meca et al. (2011)          |
|                              | ENB                                          | MTT                              | Manyes et al. (2018)        |
|                              | ENA, ENA1, ENB, ENB1                         | MTT                              | Lu et al. (2013)            |
|                              | ENB                                          | AlamarBlue, NR                   | Gammelsrud et al. (2012)    |
|                              |                                              |                                  |                             |

|                              |                        |                                  |                                |
|------------------------------|------------------------|----------------------------------|--------------------------------|
| DON, PAT, T-2                | HepG-2                 | MTT                              | Fernández-Blanco et al. (2018) |
| AFM1, OTA, ZEN               | Caco-2                 | MTT                              | Gao et al. (2016)              |
| DON, ZEN, AFB1               | BRL 3A                 | MTT, LDH release                 | Sun et al. (2015)              |
| OTA, FB1                     | HK-2, HepG-2           | MTT                              | Pinhão et al. (2020)           |
| T-2, HT-2                    | Leydig cells           | CCK-8                            | Ling et al. (2020)             |
| AFB1, FB1, OTA               | MDBK                   | MTT, NR                          | Clarke et al. (2014)           |
| OTA, ZEN                     | HepG-2                 | MTT                              | Wang et al. (2014)             |
| OTA, PAT                     | Caco-2                 | MTT                              | Assunção et al. (2019)         |
| DON, FB1, ZEN                | IPEC-J2                | MTT                              | Wan et al. (2013)              |
| ENA, ENA1, ENB, ENB1         | Caco-2                 | MTT                              | Prosperini et al. (2014)       |
| ZEN, DON, AFB1               | BF-2                   | high content screening           | Zhou et al. (2017b)            |
| AFB1, FB1                    | HepG-2, BEAS-2B        | Cell Proliferation Reagent WST-1 | McKean et al. (2006)           |
| DON, T-2 OTA, ZEN            | Vero                   | NR                               | Ruiz et al. (2011)             |
| AFB1, ZEN, DON               | HepG-2                 | MTT                              | N. Zheng et al. (2018)         |
| ZEN, DON, AFB1               | HepG-2, RAW 264.7      | AlamarBlue                       | Zhou et al. (2017a)            |
| ZEN, DON, FB1                | HepG-2                 | high content assay               | Li et al. (2018)               |
| DON, AFB1                    | porcine lymphocytes    | CCK-8                            | Kachlek et al. (2017)          |
| OTA, CIT                     | primary hepatocytes    | MTT, LDH release                 | He et al. (2010)               |
| OTA, CIT                     | HEK 293                | MTT                              | Gong et al. (2019)             |
| OTA, CIT                     | PK15                   | MTT                              | Šegvić Klarić et al. (2014)    |
| OTA, CIT                     | HepG-2                 | MTT                              | Gayathri et al. (2015)         |
| ENA, ENA1, ENB, ENB1         | Vero                   | MTT                              | Bouslimi et al. (2008)         |
| CIT, OTA                     | CHO-K1                 | MTT                              | (Lu et al., 2013)              |
| Combinations of 3 mycotoxins | IHKE                   | Caspase-3 activity               | Knecht et al. (2005)           |
| PAT, DON, T-2                | HepG-2                 | MTT                              | Fernández-Blanco et al. (2018) |
| AFM1, OTA, ZEN               | Caco-2                 | MTT                              | Gao et al. (2016)              |
| OTA, AFB1, FB1               | caco-2, RAW264.7, MDBK | MTT, NR                          | Clarke et al. (2014)           |
| DON, FB1, ZEN                | IPEC-J2                | MTT                              | Wan et al. (2013)              |
| ENA, ENA1, ENB, ENB1         | Caco-2                 | MTT                              | Prosperini et al. (2014)       |
| ZEN, DON, AFB1               | BF-2                   | high content screening           | Zhou et al. (2017b)            |
| OTA, FB1, CIT                | PBM                    | MTT                              | Stoev et al. (2009)            |
| AFB1, ZEN, DON               | HepG-2, RAW 264.7      | AlamarBlue                       | Zhou et al. (2017a)            |
| ZEN, DON, AFB1 DON, ZEN, FB1 | HepG-2                 | high content assay               | Li et al. (2018)               |
| ENA, ENA1, ENB, ENB1         | porcine lymphocytes    | CCK-8                            | Kachlek et al. (2017)          |
| Combinations of 4 mycotoxins | CHO-K1                 | MTT                              | Lu et al. (2013)               |
| ENA, ENA, ENB, ENB1          | Caco-2                 | MTT                              | Prosperini et al. (2014)       |
